# Supplementary material
Source: publisher figshare collection journal article supplement (https://asha.figshare.com/articles/dataset/_/24653613)
Supplement: Supplementary file 1 [file 2]

**Supplemental Material S2.** Examples of words used to create unique recast for four target grammatical forms.

Twenty-four words were used per session, with some words repeated across (but not within) sessions. Clinicians generated words that were appropriate for the activities used as the context for therapy in a given session.

| <b>3rd Person Singular</b> | <b>aux is</b> | <b>doesn't</b> | <b>she</b> |
|----------------------------|---------------|----------------|------------|
| adhere                     | adhere        | Adam           | admire     |
| admire                     | aim           | airplane       | agree      |
| affix                      | apologize     | alien          | analyze    |
| aim                        | apply         | alligator      | announce   |
| apologize                  | attach        | ambulance      | annoy      |
| apply                      | attack        | animal         | apologize  |
| assemble                   | balance       | Ankylosaurus   | appear     |
| assist                     | bang          | Annie          | applaud    |
| attach                     | bark          | antenna        | apply      |
| attack                     | bat           | apple          | argue      |
| balance                    | beg           | Archaeopteryx  | arrive     |
| beep                       | bend          | area           | ask        |
| beg                        | bike          | arm            | assist     |
| bend                       | bite          | Ava            | astonish   |
| bite                       | blast         | baby           | balance    |
| blast                      | blink         | backpack       | bark       |
| blaze                      | board         | badger         | bat        |
| blow                       | boink         | bag            | beam       |
| boogie                     | bolt          | Baley          | beg        |
| bounce                     | boo           | ball           | belt       |
| bow                        | boogie        | balloon        | bike       |
| breathe                    | bounce        | balloon        | bite       |
| brush                      | break         | Barret         | blush      |
| bubble                     | break dance   | baseball       | bolt       |
| buckle                     | breathe       | basket         | boogie     |
| build                      | brine         | bat            | bounce     |
| burst                      | brush         | bean           | bowl       |
| buzz                       | buckle        | bear           | brainstorm |
| call                       | build         | bee            | brawl      |
| cannonball                 | burn          | Bella          | broke      |
| carress                    | burp          | Ben            | brush      |
| carry                      | burrow        | Benny          | bubble     |
| celebrate                  | burst         | Bert           | buck       |

|             |            |                |            |
|-------------|------------|----------------|------------|
| change      | bust       | bike           | build      |
| chase       | buzz       | Billy          | burrow     |
| chew        | call       | bird           | call       |
| chomp       | cannonball | blade          | can        |
| choose      | caress     | blanket        | cartwheel  |
| chortle     | carry      | block          | catapult   |
| clatter     | catch      | blossom        | catch      |
| climb       | celebrate  | blue           | celebrate  |
| clomp       | chase      | boardwalk      | chase      |
| close       | check      | boat           | chat       |
| coach       | choose     | bone           | check      |
| collect     | chow       | bowl           | cheer      |
| color       | circle     | box            | chirp      |
| come        | clamp      | boy            | chomp      |
| complete    | clear      | branch         | choose     |
| concentrate | click      | Brandon        | chop       |
| converse    | climb      | brother        | chow       |
| count       | clomp      | buddy          | chuckle    |
| cover       | close      | building       | climb      |
| cower       | color      | bunny          | collect    |
| crack       | connect    | bus            | color      |
| crash       | console    | butterfly      | comfort    |
| create      | consume    | cap            | complain   |
| cross       | cook       | car            | complement |
| crumble     | copy       | cardboard      | consume    |
| cry         | count      | Carl           | convince   |
| cuddle      | crack      | Carla          | cook       |
| curl        | crank      | carton         | copy       |
| cut         | crawl      | cat            | cover      |
| dab         | create     | Cat in the Hat | craft      |
| damage      | creep      | Celia          | crave      |
| dance       | cross      | cement mixer   | crawl      |
| dangle      | cruise     | chair          | create     |
| dash        | crumple    | character      | cringe     |
| decorate    | crunch     | chase          | crunch     |
| deface      | crush      | check          | cry        |
| design      | cry        | chef           | cuddle     |
| despair     | cuddle     | chick          | dance      |
| destroy     | cut        | child          | dangle     |
| detail      | dance      | chocolate      | decorate   |
| devour      | dangle     | circle         | defend     |

|           |            |             |            |
|-----------|------------|-------------|------------|
| decide    | dash       | clothing    | demand     |
| die       | daydream   | cloud       | devise     |
| disappear | decorate   | Cody        | didn't     |
| distract  | defend     | color       | dig        |
| dive      | deliver    | companion   | dim        |
| do        | descend    | compartment | dip        |
| donate    | destroy    | cone        | direct     |
| dot       | devour     | cowboy      | discuss    |
| doze      | dig        | cowfish     | dismiss    |
| drag      | dip        | craft       | dive       |
| draw      | direct     | crayon      | does       |
| dream     | distract   | creation    | doze       |
| drip      | dive       | creature    | dress      |
| drive     | double     | cup         | dribble    |
| dry       | doze       | cylinder    | drip       |
| eat       | drag       | Cynthia     | dry        |
| embrace   | draw       | dad         | duck       |
| embellish | dress      | Danny       | dunk       |
| emerge    | drink      | Daphne      | eat        |
| enter     | drive      | daughter    | echo       |
| erase     | dry        | David       | elevate    |
| explain   | dump       | dessert     | embarrass  |
| explode   | eat        | dinosaur    | embrace    |
| fake      | elevate    | dog         | empty      |
| fasten    | embrace    | doggy       | encourage  |
| find      | emerge     | doll        | engage     |
| finish    | engage     | dot         | escape     |
| fish      | enlarge    | Doug        | evict      |
| fit       | enter      | dragon      | exit       |
| fix       | erase      | drum        | experiment |
| flap      | escape     | duck        | explain    |
| fling     | etch       | dude        | fake       |
| float     | exclaim    | Dumbo       | fall       |
| flutter   | exercise   | ear         | fetch      |
| fly       | exit       | egg         | fib        |
| focus     | explode    | elf         | find       |
| follow    | extinguish | eye         | fish       |
| frolic    | fall       | face        | fix        |
| frown     | fan        | father      | flap       |
| fumble    | feed       | Felipe      | flatten    |
| guard     | fend       | fence       | flee       |

|          |         |             |           |
|----------|---------|-------------|-----------|
| glare    | fetch   | finger      | flick     |
| glisten  | find    | fish        | fling     |
| glower   | fish    | fishy       | flutter   |
| glue     | fit     | flag        | fly       |
| gnaw     | fix     | flame       | fold      |
| go       | flap    | flipper     | follow    |
| gobble   | flash   | flower      | forgot    |
| grab     | flee    | fox         | frolic    |
| greet    | flex    | friend      | frown     |
| grill    | flick   | frog        | gallop    |
| groom    | float   | fruit       | gasp      |
| groove   | flow    | Gary        | gave      |
| growl    | flutter | Gavin       | gawk      |
| hammer   | fly     | gem         | get       |
| hand     | fold    | George      | giggle    |
| hatch    | follow  | ghost       | give      |
| hate     | frolic  | gift        | glance    |
| hear     | frost   | gingerbread | glide     |
| help     | frown   | giraffe     | glub      |
| hide     | gallop  | girl        | go        |
| hiss     | gasp    | glasses     | gobble    |
| hoard    | glare   | glue        | got       |
| hold     | glide   | glue stick  | grab      |
| holler   | glue    | gnome       | grant     |
| howl     | grab    | gopher      | greet     |
| hug      | greet   | grandma     | grill     |
| hunt     | grin    | guy         | grimace   |
| imagine  | groom   | hammock     | grin      |
| injure   | growl   | hamster     | grip      |
| inscribe | grumble | hand        | groove    |
| invite   | hammer  | Harry       | grow      |
| iron     | hang    | hat         | guard     |
| jiggle   | heave   | he          | guess     |
| jitter   | help    | helper      | gulp      |
| juggle   | hiccup  | hill        | handstand |
| keep     | hide    | hippo       | has       |
| kick     | hiss    | hole        | help      |
| kiss     | hit     | horn        | hesitate  |
| knock    | hold    | horse       | hide      |
| know     | honk    | house       | hint      |
| lasso    | hook    | human       | hit       |

|          |          |                        |             |
|----------|----------|------------------------|-------------|
| laugh    | hoot     | ice cream              | hog         |
| launch   | hug      | iguana                 | hold        |
| leap     | hunt     | insect                 | holler      |
| lecture  | hush     | it                     | hover       |
| lick     | imagine  | Ivan                   | hug         |
| limbo    | inch     | Jack                   | hunt        |
| line     | insert   | Jason                  | hypothesize |
| lock     | inspect  | Jasper                 | inhale      |
| love     | invite   | Jesus                  | inquire     |
| marry    | jiggle   | Joe                    | insert      |
| match    | jitter   | Joey                   | insist      |
| melt     | kick     | Johnny                 | inspect     |
| meow     | land     | Julia                  | introduce   |
| move     | lap      | Kali                   | is          |
| munch    | lasso    | Katie                  | jingle      |
| need     | latch    | Kaylee                 | juggle      |
| nibble   | laugh    | Kelly                  | kick        |
| observe  | launch   | kid                    | lather      |
| oink     | leap     | kitten                 | laugh       |
| open     | leave    | kitty                  | lay         |
| organize | lick     | Kyle                   | lean        |
| paint    | lift     | ladder                 | leap        |
| pant     | litter   | lady                   | learn       |
| pat      | lock     | lamby                  | lick        |
| peek     | love     | leaf                   | like        |
| perch    | lower    | Leah                   | listen      |
| pierce   | march    | leg                    | look        |
| point    | mark     | lego                   | lose        |
| poke     | mash     | Lenny                  | launch      |
| ponder   | measure  | lid                    | made        |
| position | meow     | lily                   | make        |
| pounce   | mope     | line                   | march       |
| practice | mosey    | little red riding hood | marry       |
| press    | move     | lizard                 | match       |
| pretend  | mow      | man                    | measure     |
| print    | munch    | Manny                  | misuse      |
| propel   | navigate | marble                 | mope        |
| protect  | nudge    | Marco                  | motivate    |
| puke     | offer    | Maria                  | munch       |
| punch    | open     | Mark                   | nap         |
| purr     | operate  | marker                 | notive      |

|          |          |                 |            |
|----------|----------|-----------------|------------|
| quack    | organize | mask            | nudge      |
| quiver   | pack     | Moana           | object     |
| rattle   | paddle   | Moe             | observe    |
| reach    | paint    | mom             | open       |
| read     | peck     | mommy           | pack       |
| reflect  | pedal    | mother          | paddle     |
| refuse   | peek     | motorcycle      | paint      |
| relax    | peel     | mouse           | panic      |
| remain   | perch    | mouth           | party      |
| remember | perform  | Mr. Bacon       | pat        |
| remove   | pierce   | Mr. Dogo        | peak       |
| require  | pilot    | Mr. Goblin      | peck       |
| rescue   | place    | Mr. Ham         | peek       |
| resemble | plan     | Mr. P.          | peel       |
| rest     | play     | Mr. Potato Head | peer       |
| retrieve | plead    | Mrs. Smith      | pelt       |
| return   | plop     | Ms. Magic       | perform    |
| ride     | plunge   | nail            | perspire   |
| rip      | point    | name            | pet        |
| roar     | poke     | ninja           | petition   |
| roast    | ponder   | noble           | photograph |
| rub      | pop      | nose            | place      |
| rule     | pounce   | number          | plant      |
| rumble   | pour     | one             | play       |
| run      | practie  | oven            | plead      |
| rustle   | press    | page            | plunge     |
| sail     | promise  | paint brush     | point      |
| sanitize | propel   | pair            | ponder     |
| save     | protect  | pal             | pop        |
| say      | pull     | paper           | pose       |
| scale    | punch    | parrot          | pour       |
| scoot    | pursue   | part            | pout       |
| scream   | push     | paw             | present    |
| scribble | race     | pen             | press      |
| scrub    | rain     | penguin         | pretend    |
| scurry   | raise    | Perry           | prick      |
| search   | reach    | pet             | propel     |
| select   | read     | Pete            | protect    |
| shade    | reject   | Phil            | pry        |
| shake    | relax    | photographer    | punch      |
| share    | remember | picture         | purchase   |

|         |            |              |           |
|---------|------------|--------------|-----------|
| shine   | remove     | piece        | question  |
| shiver  | report     | pigeon       | reach     |
| shoot   | rescue     | Piley        | read      |
| shout   | research   | pillow       | rebuild   |
| shove   | rest       | pinata       | refuse    |
| show    | return     | pinky        | rejoice   |
| shut    | reveal     | pipe cleaner | relax     |
| sigh    | ride       | Pippa        | remove    |
| sign    | roar       | pirate       | reprimand |
| sketch  | rocket     | pizza        | request   |
| skip    | rotate     | plant        | rest      |
| slam    | ruin       | plate        | ride      |
| sled    | rumble     | policeman    | rip       |
| sleep   | rush       | pompom       | roar      |
| slide   | scale      | prankster    | rock      |
| slither | scamper    | puppy        | row       |
| slurp   | scoot      | Raybot       | rub       |
| smell   | scope      | rebel        | run       |
| smile   | scrape     | reptile      | sad       |
| smoke   | scream     | rhino        | said      |
| smooch  | scribble   | Ritchie      | sail      |
| smooth  | scurry     | Robby        | saw       |
| snap    | search     | robot        | say       |
| snare   | serenade   | rock         | scamper   |
| sneak   | serve      | rodent       | scan      |
| sniff   | shake      | Ronnie       | scarf     |
| snooze  | share      | Santa        | scowl     |
| snorkel | shock      | Sarah        | scramble  |
| snort   | shoot      | scale        | scream    |
| sort    | shove      | scooper      | sculpt    |
| sparkle | show       | section      | scurry    |
| spell   | shriek     | sedan        | search    |
| spill   | shuffle    | Serena       | see       |
| splash  | shush      | she          | select    |
| sponge  | shut       | shirt        | shake     |
| spritz  | sink       | shoe         | share     |
| spray   | sit        | side         | shimmy    |
| spread  | skateboard | Simon        | shoo      |
| spy     | sketch     | slate        | shop      |
| squawk  | ski        | slide        | shove     |
| squeak  | skip       | smoke        | shriek    |

|          |            |              |            |
|----------|------------|--------------|------------|
| squeeze  | slam       | snack        | shuffle    |
| squint   | slather    | snake        | sift       |
| squish   | sled       | snowman      | sign       |
| stack    | sleep      | splat        | sing       |
| staple   | slide      | square       | sink       |
| stare    | slip       | stand        | sip        |
| start    | slither    | star         | sit        |
| stay     | slobber    | starfish     | skateboard |
| step     | slumber    | Stego[surus] | skip       |
| stick    | slurp      | Steve        | sleep      |
| stink    | smack      | stick        | slid       |
| stomp    | smash      | sticker      | slide      |
| stow     | smile      | supply       | slither    |
| stroke   | smooch     | Suzie        | slump      |
| strut    | snack      | sword        | smack      |
| suck     | snag       | T Rex        | smell      |
| surprise | snap       | tail         | smile      |
| sway     | snarf      | taxi         | snack      |
| swim     | sneak      | Teddy bear   | snap       |
| swing    | sniff      | thumb        | snatch     |
| swirl    | snorkel    | tile         | sneak      |
| take     | soar       | time         | snicker    |
| tame     | somersault | Timmy        | sniff      |
| tangle   | sparkle    | Tommy        | snip       |
| tear     | speed      | tooth        | snooze     |
| tease    | spill      | tooth fairy  | snowboard  |
| thread   | spin       | toothbrush   | snuggle    |
| throw    | spit       | top          | soar       |
| tie      | splash     | toucan       | somersault |
| tip toe  | spook      | tower        | spill      |
| tire     | spray      | toy          | spin       |
| titter   | spring     | tree         | splash     |
| toot     | sprint     | triangle     | spook      |
| toss     | spy        | truck        | spring     |
| toy      | squeak     | underwear    | sprint     |
| trap     | squeeze    | unicorn      | squawk     |
| tremble  | squirm     | vehicle      | squeal     |
| trim     | squirt     | wall         | squeeze    |
| triumph  | squish     | water bottle | stack      |
| trot     | surprise   | Weebot       | stare      |
| trust    | stack      | wheat        | statue     |



|         |          |            |            |
|---------|----------|------------|------------|
| try     | stain    | whisker    | stay       |
| tumble  | stand    | Will       | steal      |
| turn    | steer    | Willy      | steer      |
| twist   | stick    | wing       | step       |
| unroll  | stomp    | wolf       | stomp      |
| vacuum  | stop     | woman      | stop       |
| vanish  | stretch  | woodcutter | stretch    |
| wade    | struggle | wool       | stroll     |
| wag     | strum    | worm       | struggle   |
| wail    | study    | yours      | strut      |
| wait    | submerge | Zeus       | sulk       |
| wake    | surprise |            | supplement |
| want    | swallow  |            | surf       |
| wave    | swat     |            | swallow    |
| wear    | sway     |            | swat       |
| weigh   | sweat    |            | sway       |
| whisper | sweep    |            | swing      |
| whiz    | swerve   |            | swirl      |
| whoosh  | swim     |            | swoop      |
| wind    | swing    |            | tag        |
| wipe    | swoop    |            | take       |
| wobble  | tackle   |            | talk       |
| wonder  | take     |            | teach      |
| write   | talk     |            | think      |
| yank    | tangle   |            | throw      |
| yell    | tap      |            | tidy       |
| yowl    | teach    |            | tie        |
| zip     | test     |            | tilt       |
|         | thank    |            | toss       |
|         | think    |            | touch      |
|         | throw    |            | trace      |
|         | tingle   |            | transport  |
|         | tire     |            | travel     |
|         | toss     |            | trot       |
|         | touch    |            | tumble     |
|         | trace    |            | twirl      |
|         | trade    |            | twist      |
|         | train    |            | understand |
|         | trot     |            | unpack     |
|         | tug      |            | use        |
|         | tumble   |            | vacuum     |

|           |           |
|-----------|-----------|
| turn      | volunteer |
| tweet     | waddle    |
| twinkle   | wade      |
| twirl     | wail      |
| twist     | wait      |
| vandalize | walk      |
| volunteer | wants     |
| wait      | watch     |
| walk      | water     |
| wane      | wave      |
| warn      | wear      |
| watch     | weep      |
| wave      | welcome   |
| wear      | wheel     |
| weigh     | whimper   |
| whimper   | wiggle    |
| whine     | wipe      |
| wiggle    | wish      |
| wilt      | wobble    |
| win       | worry     |
| wind      | yawn      |
| wink      | yelp      |
| wipe      | zoom      |
| wish      |           |
| wobble    |           |
| whoop     |           |
| wrangle   |           |
| wrap      |           |
| write     |           |
| yawn      |           |
| yell      |           |
| zip       |           |
| zoom      |           |

---
