# Supplementary material
Source: publisher figshare collection journal article supplement (https://asha.figshare.com/articles/dataset/_/24653613)

**Supplemental Material S3.** Children's performance on generalization probes for the grammatical form that served as the target of remediation (Target) and control forms (Control) that were tracked, but not treated.

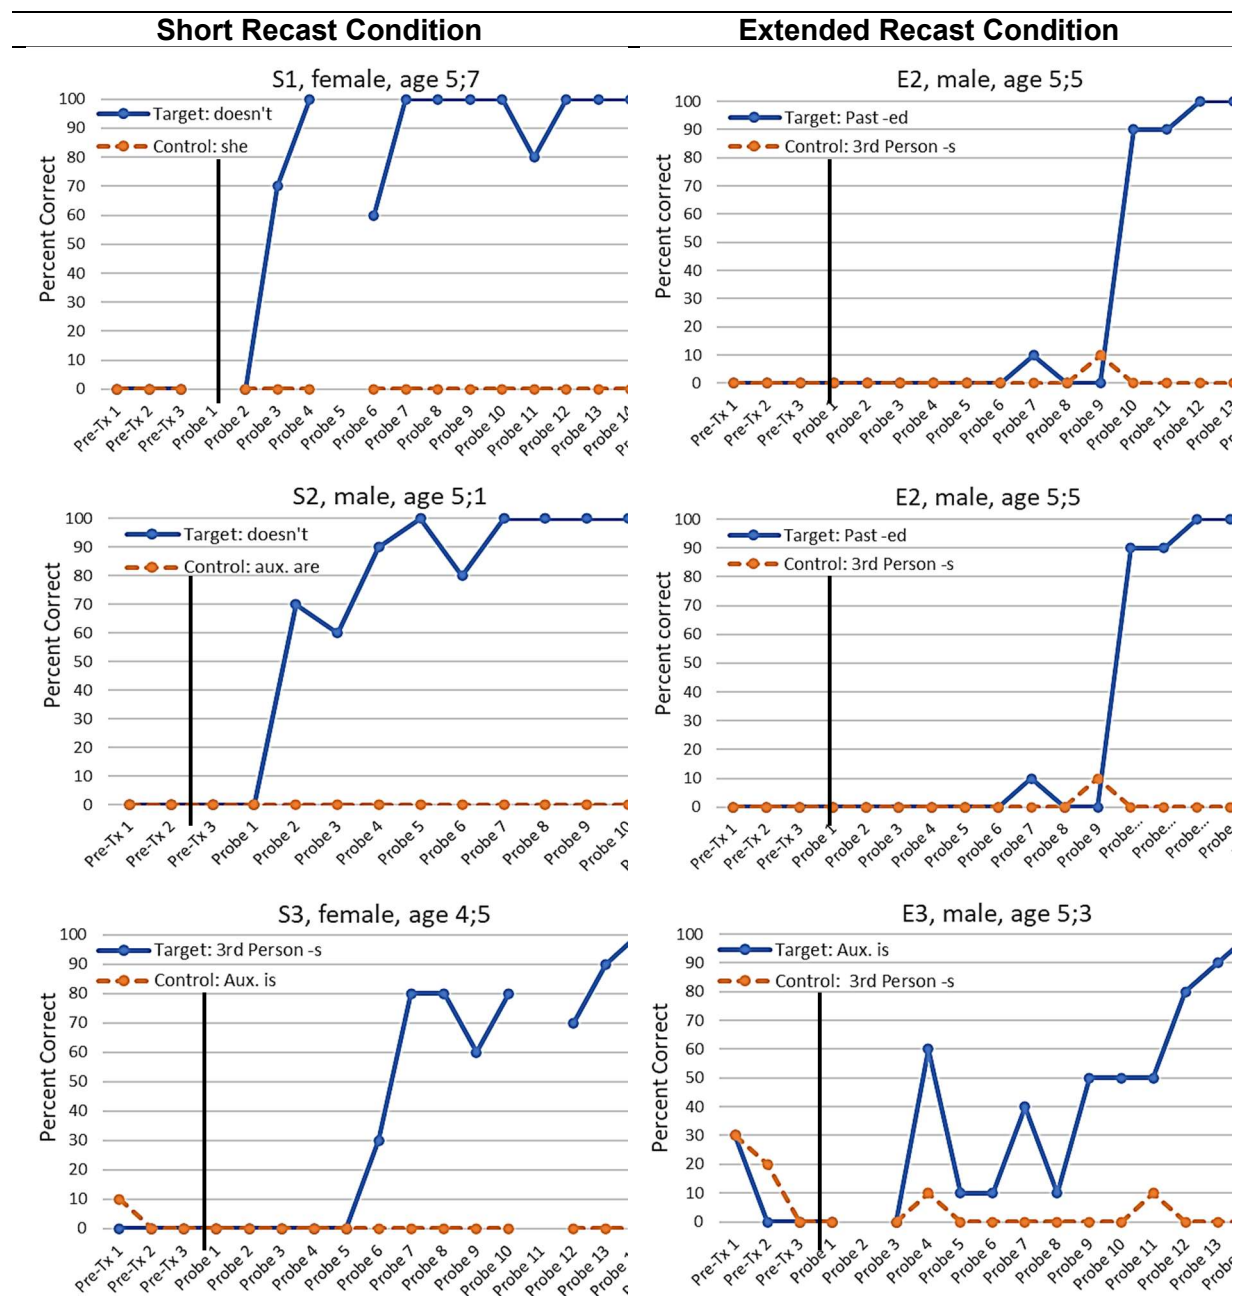

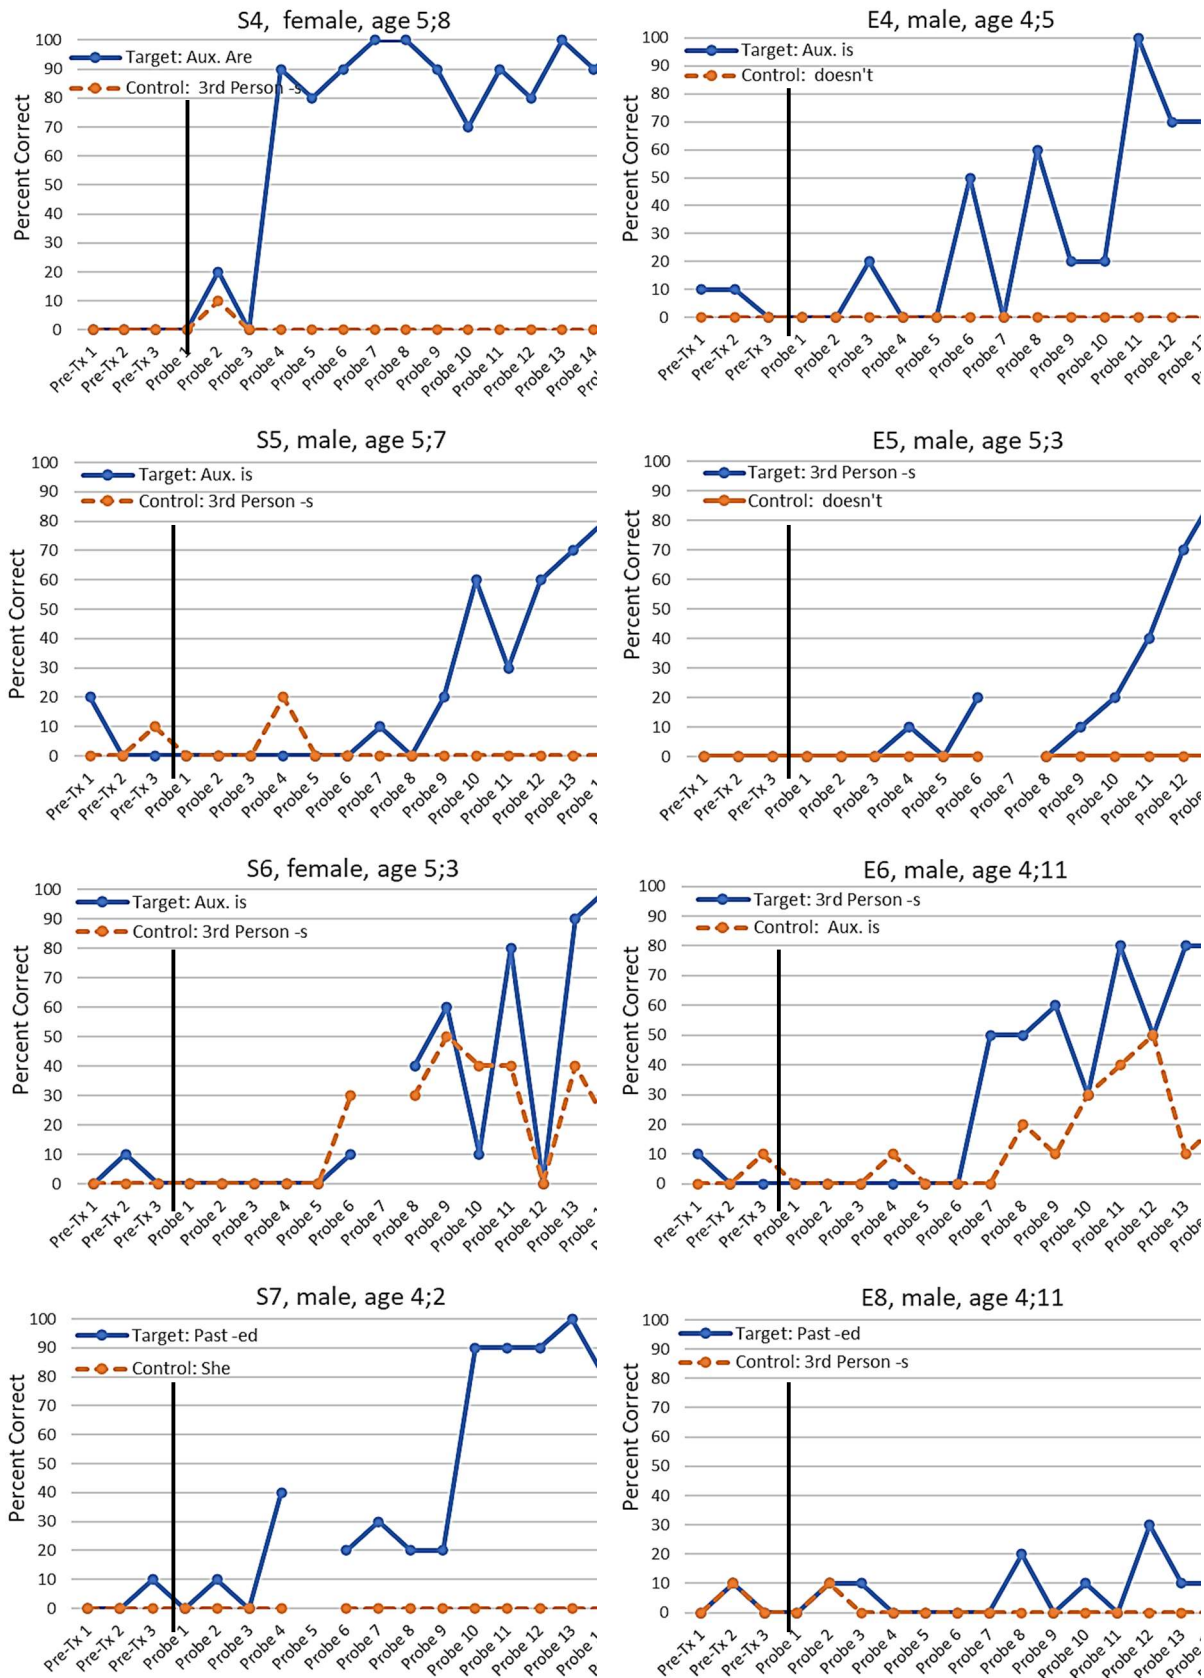

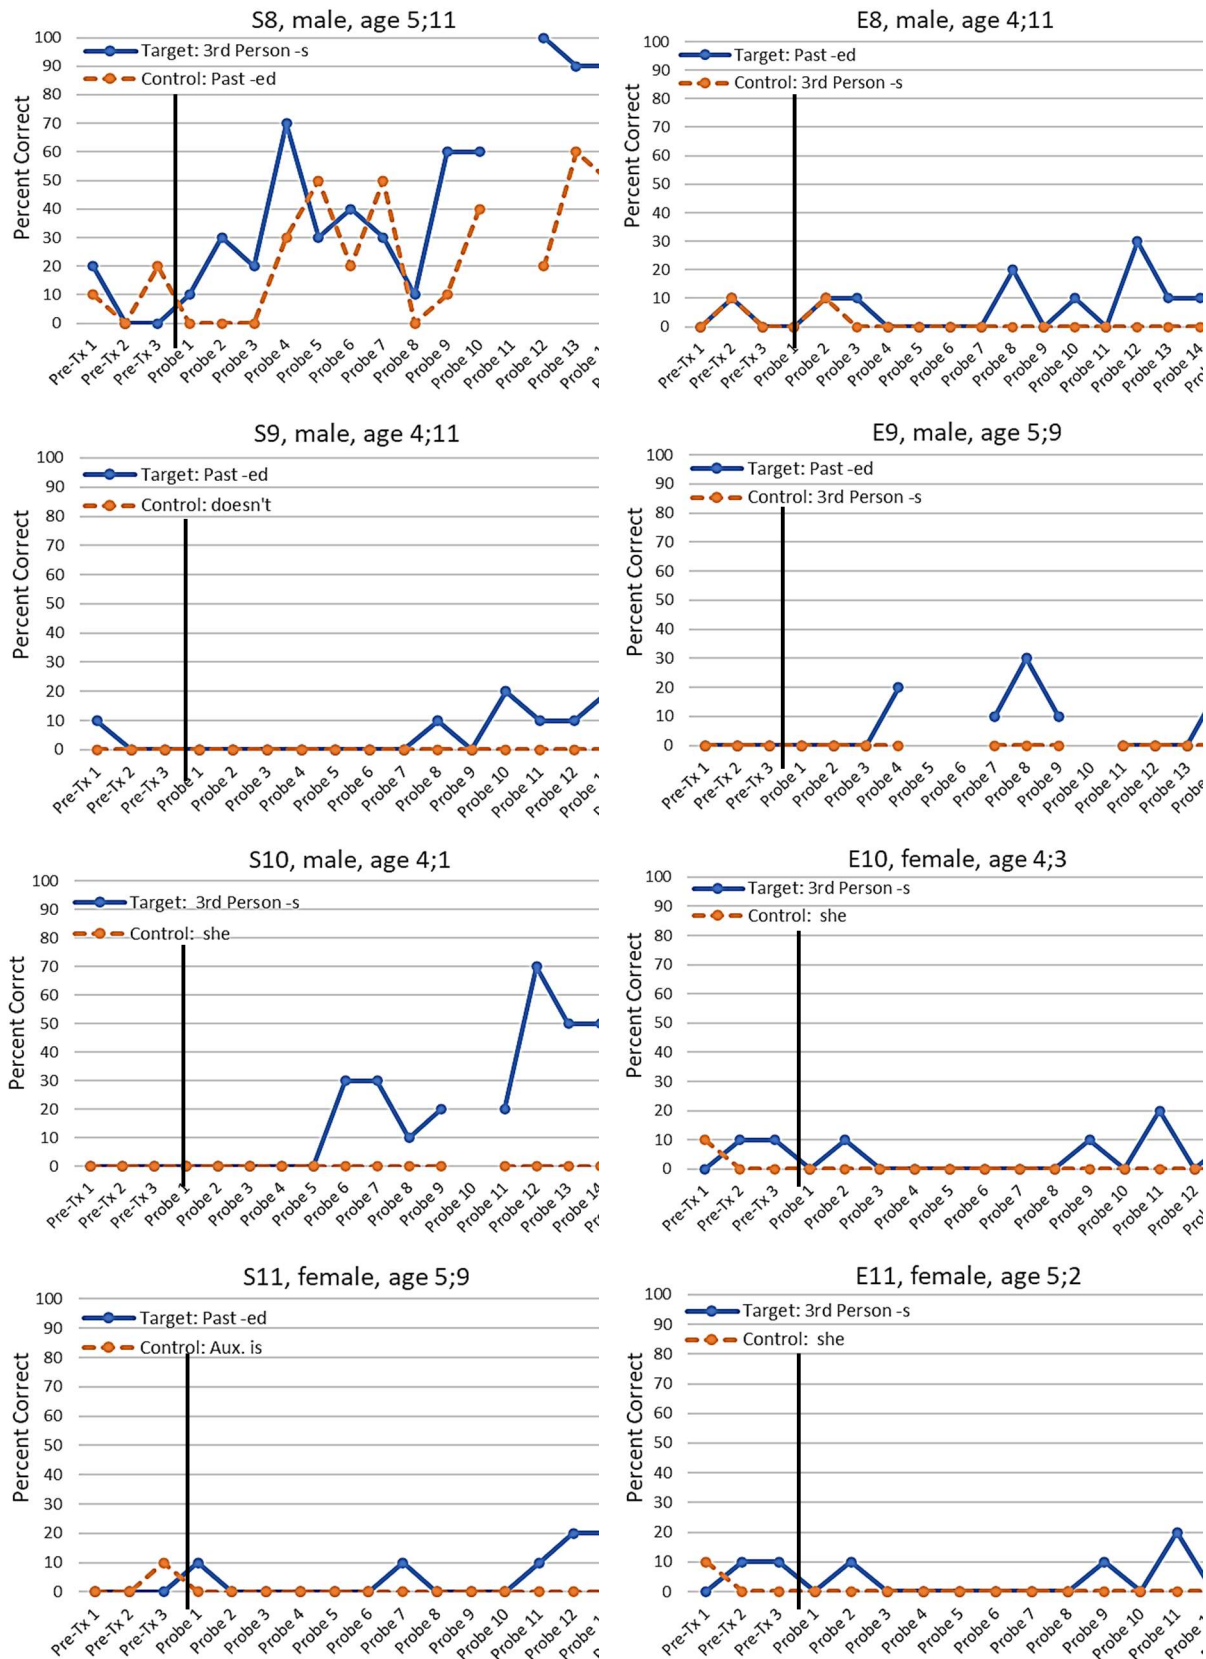

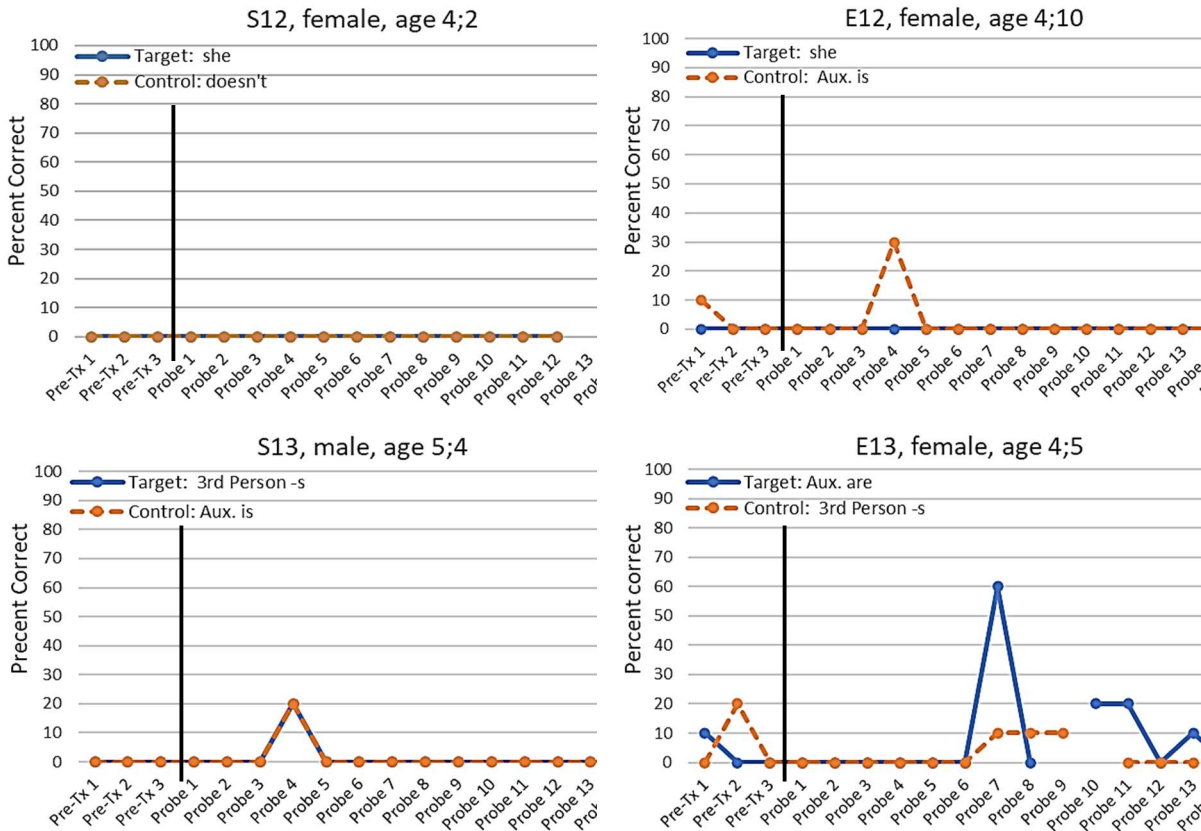

Supplement: Supplementary file 2 [file 2]
