# Supplementary material
Source: publisher figshare collection journal article supplement (https://asha.figshare.com/articles/dataset/_/24653613)
Supplement: Supplementary file 3 [file 2]

**Supplemental Material S1.** Standard story narrative accompanying the picture book *Chalk* (Thompson, 2010). Each line is associated with a single page in the storybook.

One very rainy day, three kids walked to the park.  
And what did they see? A fancy bag hung from the mouth of a dinosaur rocker.  
One brave boy in a yellow raincoat looked inside the special bag.  
Inside, the kids saw sticks of chalk in many colors.  
Kelsey took out a fat yellow piece.  
She drew a picture of a sun right on the pavement.  
Then something surprising happened! Her picture turned into a real sun, that rose into the sky.  
The children could not even look at it because it was so bright.  
When the sun got to the sky, it stopped the rain.  
Josie picked up a piece of orange chalk.  
She drew many butterflies on the pavement. And what do you think happened?  
The pictures turned into real butterflies that flew all around them.  
Irwin got an idea in his head and picked a green piece of chalk.  
He drew a big scary green dinosaur.  
Uh oh!  
A dinosaur stomped up out of his drawing and turned his sharp teeth to the children.  
Kelsey scrambled up the ladder as Irwin hid inside a tunnel.  
Josie hid under a bridge and screamed out loud.  
The dinosaur spied Kelsey and Irwin inside the tunnel.  
Irwin still had one piece of chalk in his hand. Quickly, he drew a rain cloud and rain falling below it.  
The clouds in the sky turned dark and big drops of rain started to fall from the sky.  
Josey looked out from her hiding place and saw something unbelievable.  
The falling rain washed away the dinosaur, piece by piece.  
Soon, there was nothing left but a big puddle of green chalk.  
The kids decided that was enough for one day and returned the bag of chalk to where they had found it.  
They walked home only half believing what had happened.
